# Supplementary material
Source: publisher figshare collection journal article supplement (https://diabetesjournals.figshare.com/articles/dataset/_/12814262)

**Table S1. Gut hormones, glucose and insulin responses during the mixed meal tolerance test**

| Gut hormone                                       | Group         | Pre-op visit<br>n=24 | 2 weeks post-op<br>n=24 | p <sup>a</sup> | 20% weight<br>loss time point<br>(n=24) | p <sup>b</sup> |
|---------------------------------------------------|---------------|----------------------|-------------------------|----------------|-----------------------------------------|----------------|
| Peak active GLP-1<br>(pmol/L)                     | Standard Limb | 24 ± 33              | 78 ± 41                 | 0.34           | 70 ± 32                                 | 0.43           |
|                                                   | Long Limb     | 16 ± 13              | 62 ± 30                 |                | 70 ± 19                                 |                |
| Active GLP-1 AUC<br>(pmol·min/L)                  | Standard Limb | 2574 ± 4082          | 5338 ± 3968             | 0.68           | 5312 ± 3711                             | 0.18           |
|                                                   | Long Limb     | 1384 ± 1404          | 4528 ± 1764             |                | 3812 ± 1327                             |                |
| Peak total GLP-1<br>(pmol/L)                      | Standard Limb | 13 ± 6               | 105 ± 49                | 0.48           | 117 ± 57                                | 0.68           |
|                                                   | Long Limb     | 14 ± 10              | 96 ± 33                 |                | 112 ± 38                                |                |
| Total GLP-1 AUC<br>(pmol·min/L)                   | Standard Limb | 1017 ± 394           | 6190 ± 2566             | 0.68           | 6281 ± 2586                             | 0.71           |
|                                                   | Long Limb     | 1044 ± 543           | 6487 ± 1987             |                | 6039 ± 2555                             |                |
| Peak concentration of<br>PYY (pmol/L)             | Standard Limb | 56 [31, 75]          | 125 [106, 151]          | 0.26           | 104 [85, 158]                           | 0.29           |
|                                                   | Long Limb     | 33 [27, 69]          | 115 [90, 154]           |                | 101 [74, 120]                           |                |
| PYY<br>concentrationAUC<br>(pmol·min/L)           | Standard Limb | 6012 [5310, 10072]   | 12583 [11336, 14536]    | 0.55           | 14472 [10444, 16385]                    | 0.78           |
|                                                   | Long Limb     | 7348 [6563, 9986]    | 13054 [11073, 15911]    |                | 11189 [5514, 12851]                     |                |
| Peak concentration of<br>total GIP (pmol/L)       | Standard Limb | 75 [39, 110]         | 120 [40, 205]           | 0.69           | 129 [61, 259]                           | 0.20           |
|                                                   | Long Limb     | 101 [31, 171]        | 110 [76, 160]           |                | 88 [38, 181]                            |                |
| GIP concentration<br>AUC (pmol·min/L)             | Standard Limb | 5276 [1219, 9671]    | 4329 [1537, 11941]      | 0.22           | 9185 [4006, 15486]                      | 0.69           |
|                                                   | Long Limb     | 11641 [1965, 14666]  | 9184 [4782, 9829]       |                | 6041 [4174, 11893]                      |                |
| Peak plasma glucose<br>(mmol/L)                   | Standard Limb | 15.3 [13.2, 17.2]    | 10.3 [8.7, 12.6]        | 0.76           | 9.3 [7.7, 11.0]                         | 0.32           |
|                                                   | Long Limb     | 14.4 [11.4, 17.5]    | 10.5 [8.9, 11.1]        |                | 8.0 [6.9, 9.3]                          |                |
| Plasma glucose AUC<br>(mmol·min/L)                | Standard Limb | 2828 [2450, 3172]    | 1828 [1553, 2189]       | 0.66           | 1564 [1276, 1896]                       | 0.38           |
|                                                   | Long Limb     | 2647 [2103, 3221]    | 1862 [1632, 2006]       |                | 1301 [1170, 1580]                       |                |
| Incremental plasma<br>glucose AUC<br>(mmol·min/L) | Standard Limb | 509 ± 250            | 517 ± 180               | 0.02           | 491 ± 212                               | 0.01           |
|                                                   | Long Limb     | 470 ± 197            | 394 ± 131               |                | 335 ± 140                               |                |
| Peak serum insulin<br>(mU/L)                      | Standard Limb | 29 ± 14              | 37 ± 16                 | 0.93           | 42 ± 20                                 | 0.37           |
|                                                   | Long Limb     | 28 ± 16              | 36 ± 21                 |                | 38 ± 18                                 |                |
| Serum insulin AUC<br>(mU·min/L)                   | Standard Limb | 5281 ± 2464          | 6259 ± 3088             | 0.89           | 6433 ± 3058                             | 0.34           |
|                                                   | Long Limb     | 5128 ± 2833          | 6037 ± 3481             |                | 5716 ± 2879                             |                |

Continuous data presented as mean ± SD when normally distributed or median [interquartile range] when non-normally distributed. Statistical test used: ANCOVA. p-values refer to comparing Long Limb versus Standard Limb outcomes at 2 weeks post-op visit (p<sup>a</sup>) and 20% weight loss visit (p<sup>b</sup>). Differences adjusted for outcome at baseline. GLP-1 – glucagon-like peptide-1, PYY – peptide YY. GIP – gastric inhibitory polypeptide. AUC – area under the curve, calculated from time point 0 to 120 mins for all values but glucose where AUC was calculated from time point 0 to 180 mins.

**Table S2. Rate of glucose appearance and disappearance in the hyperinsulinaemic-euglycaemic clamps**

| <b>Variable</b>          | <b>Group</b>  | <b>Pre-op visit<br/>(n=23)</b> | <b>2 weeks<br/>post-op<br/>(n=23)</b> | <b>p<sup>a</sup></b> | <b>20% weight<br/>loss time<br/>point (n=23)</b> | <b>p<sup>b</sup></b> |
|--------------------------|---------------|--------------------------------|---------------------------------------|----------------------|--------------------------------------------------|----------------------|
| Ra low<br>(umol/min/kg)  | Standard Limb | 5.1 ± 1.7                      | 3.4 ± 0.9                             | 0.94                 | 2.8 ± 1.3                                        | 0.62                 |
|                          | Long Limb     | 5.0 ± 2.4                      | 3.4 ± 1.4                             |                      | 2.6 ± 1.7                                        |                      |
| Ra high<br>(umol/min/kg) | Standard Limb | 1.9 ± 2.4                      | 0.6 ± 1.7                             | 0.86                 | 0.0 ± 1.8                                        | 0.09                 |
|                          | Long Limb     | 1.1 ± 2.0                      | 0.7 ± 1.7                             |                      | -1.0 ± 1.3                                       |                      |
| Rd low<br>(umol/min/kg)  | Standard Limb | 9.8 ± 1.6                      | 11.8 ± 2.9                            | 0.18                 | 15.2 ± 2.9                                       | 0.36                 |
|                          | Long Limb     | 10.6 ± 3.6                     | 13.6 ± 4.2                            |                      | 16.5 ± 4.1                                       |                      |
| Rd high<br>(umol/min/kg) | Standard Limb | 18.7 ± 7.6                     | 29.0 ± 9.1                            | 0.98                 | 36.1 ± 8.5                                       | 0.47                 |
|                          | Long Limb     | 19.1 ± 9.4                     | 29.8 ± 9.8                            |                      | 38.1 ± 9.2                                       |                      |

Continuous data presented as mean ± SD when normally distributed. Statistical test used: ANCOVA. p-values refer to comparing Long Limb versus Standard Limb outcomes at 2 weeks post-op visit (p<sup>a</sup>) and 20% weight loss visit (p<sup>b</sup>). Differences adjusted for outcome at baseline. Ra: rate of glucose appearance. Rd: rate of glucose disappearance. Low: measured in the phase of low-dose insulin infusion. High: measured in the phase of high-dose insulin infusion.

**Table S3. Glucose-lowering medications**

| <b>Characteristic</b>                                               | <b>Long Limb<br/>RYGB Baseline<br/>n=26</b> | <b>Standard<br/>Limb RYGB<br/>Baseline n=27</b> | <b>Long Limb<br/>RYGB 1-year<br/>post-operatively<br/>n=26</b> | <b>Standard Limb<br/>RYGB 1-year<br/>post-operatively<br/>n=26</b> |
|---------------------------------------------------------------------|---------------------------------------------|-------------------------------------------------|----------------------------------------------------------------|--------------------------------------------------------------------|
| <b>Number of glucose-lowering medications at baseline (classes)</b> |                                             |                                                 |                                                                |                                                                    |
| 1                                                                   | 11% (3)                                     | 4% (1)                                          | 0                                                              | 0                                                                  |
| 2                                                                   | 27% (7)                                     | 44% (12)                                        | 0                                                              | 0                                                                  |
| 3                                                                   | 35% (9)                                     | 26% (7)                                         | 1                                                              | 0                                                                  |
| 4                                                                   | 27% (7)                                     | 19% (5)                                         | 0                                                              | 0                                                                  |
| 5                                                                   | 0% (0)                                      | 7% (2)                                          | 0                                                              | 0                                                                  |
| <b>Classes of medications</b>                                       |                                             |                                                 |                                                                |                                                                    |
| Biguanides                                                          | 92% (24)                                    | 93% (25)                                        | 1                                                              | 0                                                                  |
| SGLT-2 inhibitors                                                   | 54% (14)                                    | 56% (15)                                        | 1                                                              | 0                                                                  |
| Sulfonylurea                                                        | 50% (13)                                    | 48% (13)                                        | 0                                                              | 0                                                                  |
| GLP-1 agonists                                                      | 35% (9)                                     | 15% (4)                                         | 1                                                              | 0                                                                  |
| DPP-4 inhibitors                                                    | 31% (8)                                     | 52% (14)                                        | 0                                                              | 0                                                                  |
| Insulin                                                             | 15% (4)                                     | 15% (4)                                         | 0                                                              | 0                                                                  |
| Total                                                               | 72                                          | 75                                              |                                                                |                                                                    |

Categorical data presented as percentage (n). RYGB – Roux-en-Y gastric bypass. SGLT-2 – sodium-glucose transport protein-2. GLP-1 – glucagon-like peptide-1. DPP-4 – dipeptidyl peptidase-4 inhibitor.

**Figure S1. A: Glycated haemoglobin; B: total body weight loss; C: T2D remission in the first post-operative year.** Data expressed as means  $\pm$  SD. N=26 in each group. Mixed-effects model analysis with Bonferroni adjustment for multiple comparisons. Stars in blue and red indicate statistical significance in the within group comparison of the Standard and Long Limb groups respectively to baseline (\* $p$ <0.05, \*\* $p$ <0.01, \*\*\* $p$ <0.001).

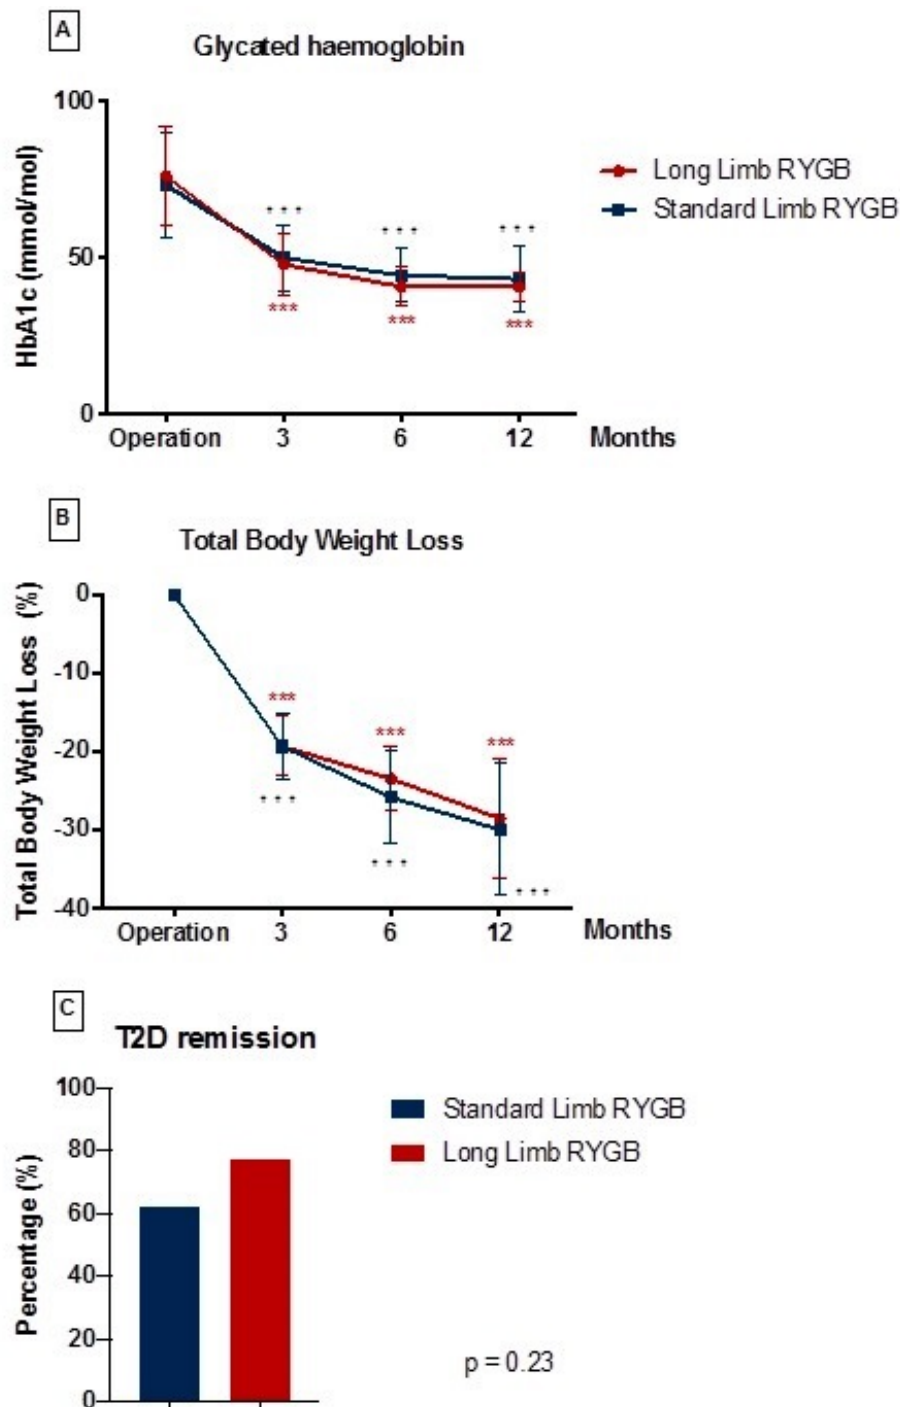

Figure S2. Glucose-lowering medications use

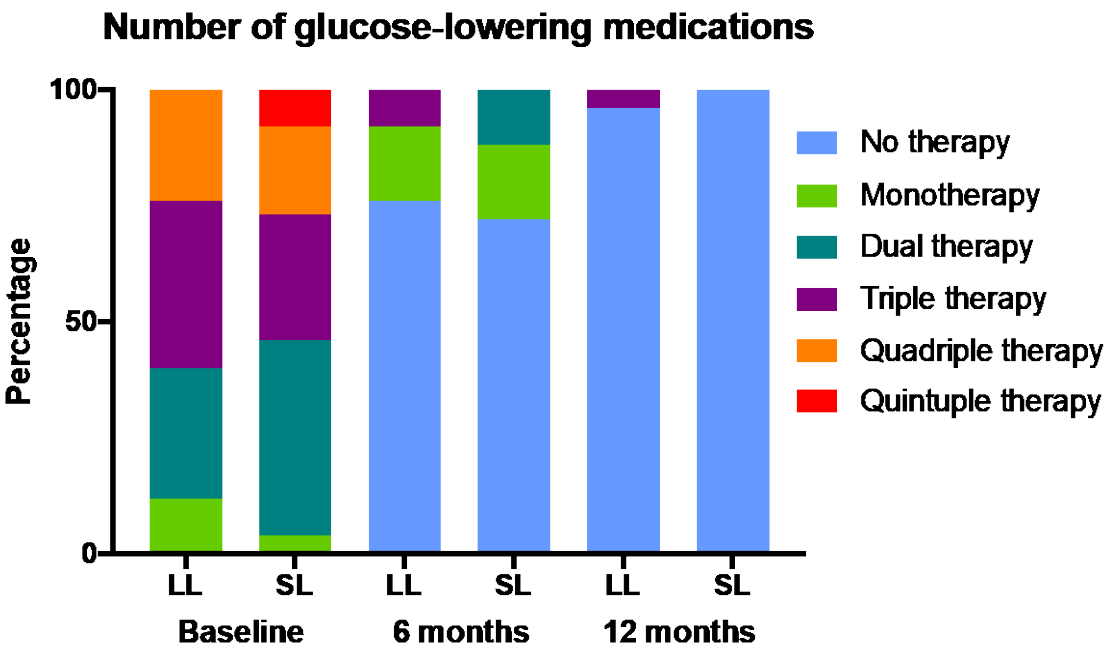

**Table S4. Intra-operative small intestinal length measurements**

|                                                              | <b>Long Limb RYGB n=25</b> | <b>Standard Limb RYGB n=26</b> |
|--------------------------------------------------------------|----------------------------|--------------------------------|
| Common channel length (cm)                                   | 360 [305-435] (250-660)    | 465 [320-528] (170-590)        |
| Total small intestinal length (cm)                           | 610 [555-685] (520-910)    | 615 [470-678] (320-740)        |
| Biliopancreatic limb/total small intestinal length ratio (%) | 25 [22-27] (16-29)         | 8 [7-11] (7-16)                |
| Common channel/total small intestinal length ratio (%)       | 59 [55-64] (48-73)         | 76 [68-78] (53-80)             |
| Operating time (minutes)                                     | 164 ± 51 (59-241)          | 146 ± 42 (79-250)              |
| BPL/TSIL correlations with active GLP-1 peak at 2 weeks      | r = 0.16 p = 0.45          | r = 0.05 p = 0.84              |
| BPL/TSIL correlations with GLP-1 AUC at 2 weeks              | r = 0.18 p = 0.89          | r = 0.07 p = 0.41              |

Continuous data presented as mean ± SD, range when normally distributed or median and 25-75% interquartile range, range when non-normally distributed. Correlations calculated with Pearson correlation coefficients RYGB – Roux-en-Y gastric bypass, BPL/TSIL - biliopancreatic limb to total small intestinal length ratio, AUC – area under the curve.

**Table S5. Post-operative adverse events and complications**

| Adverse Event                                                 | Long Limb RYGB<br>n=26 | Standard Limb RYGB<br>n=27 |
|---------------------------------------------------------------|------------------------|----------------------------|
| <b>Cardiovascular</b>                                         | 0                      | 0                          |
| <b>Gastrointestinal</b>                                       |                        |                            |
| Anastomotic stricture                                         | 1                      | 0                          |
| Anastomotic ulcer                                             | 0                      | 1                          |
| Peri-operative bleeding                                       | 2                      | 0                          |
| Gallstones                                                    | 1                      | 0                          |
| Abdominal pain                                                | 1                      | 0                          |
| Laparotomy for purulent peritonitis                           | 1                      | 0                          |
| Gastritis                                                     | 1                      | 0                          |
| Diarrhoea                                                     | 1                      | 2                          |
| Constipation                                                  | 0                      | 1                          |
| <b>Infections</b>                                             |                        |                            |
| Wound infection                                               | 4                      | 2                          |
| Pneumonia                                                     | 4                      | 2                          |
| Viral tonsillitis                                             | 1                      | 0                          |
| <b>Soft tissue and musculoskeletal</b>                        |                        |                            |
| Incisional hernia                                             | 1                      | 0                          |
| Limb fracture                                                 | 0                      | 1                          |
| <b>Nutritional and metabolic</b>                              |                        |                            |
| Intravenous treatment for dehydration                         | 0                      | 1                          |
| Acute kidney injury                                           | 0                      | 2                          |
| Anaemia                                                       | 2                      | 2                          |
| Vasovagal                                                     | 1                      | 2                          |
| Hypoglycaemic episode                                         | 2                      | 2                          |
| <b>Adverse Events leading to hospitalisation</b>              | 5 (in 3 participants)  | 4 (in 4 participants)      |
| <b>Clavien-Dindo classification of complications (grades)</b> |                        |                            |
| I                                                             | 6                      | 11                         |
| II                                                            | 14                     | 9                          |
| IIIa                                                          | 1                      | 0                          |
| IIIb                                                          | 1                      | 0                          |
| IV                                                            | 1                      | 0                          |
| V                                                             | 0                      | 0                          |
| Total                                                         | 23                     | 20                         |

Clavien-Dindo classification: **Grade I:** Any deviation from the normal post-operative course not requiring surgical, endoscopic or radiological intervention. This includes the need for certain drugs (e.g. antiemetics, antipyretics, analgesics, diuretics and electrolytes), treatment with physiotherapy and wound infections that are opened at the bedside. **Grade II:** Complications requiring drug treatments other than those allowed for Grade I complications; this includes blood transfusion and total parenteral nutrition (TPN). **Grade III:** Complications requiring surgical, endoscopic or radiological intervention; **Grade IIIa** - intervention not under general anaesthetic; **Grade IIIb** - intervention under general anaesthetic. **Grade IV:** Life-threatening complications; this includes CNS complications (e.g. brain haemorrhage, ischaemic stroke, subarachnoid haemorrhage) which require intensive care, but excludes transient ischaemic attacks (TIAs); **Grade IVa** - single-organ dysfunction (including dialysis); **Grade IVb** - multi-organ dysfunction. **Grade V:** Death of the patient.

**Table S6. Mechanistic data: within groups comparisons of glucose, insulin and GLP-1 excursions during the MMTT and rate of glucose appearance and disappearance in clamps**

| Variable                                       | Group         | Pre-op visit | 2 weeks post-op | 20% weight loss | Mixed-effects analyses |         |                      |         |                      |         | Post hoc comparisons<br>p value |                           |
|------------------------------------------------|---------------|--------------|-----------------|-----------------|------------------------|---------|----------------------|---------|----------------------|---------|---------------------------------|---------------------------|
|                                                |               |              |                 |                 | Group effect           |         | Visit effect         |         | Group * Visit        |         | Pre-op vs 2 weeks post-op       | Pre-op vs 20% weight loss |
|                                                |               |              |                 |                 | (DFn, DFd) = F value   | P value | (DFn, DFd) = F value | P value | (DFn, DFd) = F value | P value |                                 |                           |
| AUC of plasma glucose (mmol·min/L)             | Long Limb     | 2639 ± 659   | 1957 ± 653      | 1428 ± 430      | (1, 48) = 1.3          | 0.27    | (2, 96) = 96.1       | <0.001  | (2, 96) = 1.2        | 0.29    | <0.001                          | <0.001                    |
|                                                | Standard Limb | 2876 ± 617   | 1938 ± 562      | 1642 ± 551      |                        |         |                      |         |                      |         | <0.001                          | <0.001                    |
| Peak of plasma glucose (mmol/L)                | Long Limb     | 16.5 ± 4.1   | 13.9 ± 4.3      | 11.3 ± 2.4      | (1, 48) = 1.9          | 0.17    | (2, 96) = 32         | <0.001  | (2, 96) = 1.2        | 0.29    | 0.008                           | <0.001                    |
|                                                | Standard Limb | 17.5 ± 3.7   | 14.1 ± 3.4      | 13.4 ± 4.0      |                        |         |                      |         |                      |         | <0.001                          | <0.001                    |
| AUC of serum insulin (mU·min/L)                | Long Limb     | 5128 ± 2833  | 6028 ± 3405     | 5657 ± 2831     | (1, 48) = 0.3          | 0.59    | (2, 95) = 4          | 0.02    | (2, 95) = 0.4        | 0.64    | 0.20                            | 0.81                      |
|                                                | Standard Limb | 5280 ± 2464  | 6259 ± 3088     | 6433 ± 3059     |                        |         |                      |         |                      |         | 0.15                            | 0.07                      |
| Peak of serum insulin (mU/L)                   | Long Limb     | 43.4 ± 27.0  | 76.1 ± 51.4     | 81.8 ± 38.3     | (1, 48) = 0.4          | 0.54    | (2, 95) = 40.5       | <0.001  | (2, 95) = 0.3        | 0.72    | <0.001                          | <0.001                    |
|                                                | Standard Limb | 43.9 ± 23.0  | 84.1 ± 44.0     | 90.6 ± 45.7     |                        |         |                      |         |                      |         | <0.001                          | <0.001                    |
| AUC of active GLP-1 (pmol·min/L)               | Long Limb     | 1274 ± 1347  | 4528 ± 1764     | 3812 ± 1327     | (1, 48) = 1.8          | 0.18    | (2, 79) = 104.8      | <0.001  | (2, 79) = 0.58       | 0.56    | <0.001                          | <0.001                    |
|                                                | Standard Limb | 2330 ± 3832  | 5357 ± 3864     | 5259 ± 3613     |                        |         |                      |         |                      |         | <0.001                          | <0.001                    |
| Peak of active GLP-1 (pmol/L)                  | Long Limb     | 15.6 ± 13.2  | 61.9 ± 30.5     | 67.8 ± 22.0     | (1, 48) = 1.7          | 0.20    | (2, 96) = 100.7      | <0.001  | (2, 96) = 1.4        | 0.26    | <0.001                          | <0.001                    |
|                                                | Standard Limb | 24.3 ± 33.1  | 77.9 ± 41.5     | 70.5 ± 31.3     |                        |         |                      |         |                      |         | <0.001                          | <0.001                    |
| Ra in low -dose insulin infusion (umol/min/kg) | Long Limb     | 4.99 ± 2.37  | 3.43 ± 1.38     | 2.56 ± 1.73     | (1, 46) = 0.3          | 0.60    | (2, 92) = 43.0       | <0.001  | (2, 92) = 0.1        | 0.92    | <0.001                          | <0.001                    |
|                                                | Standard Limb | 5.21 ± 1.73  | 3.44 ± 0.93     | 2.84 ± 1.34     |                        |         |                      |         |                      |         | <0.001                          | <0.001                    |
| Ra in high-dose insulin infusion (umol/min/kg) | Long Limb     | 1.17 ± 1.99  | 0.67 ± 1.70     | -0.97 ± 1.29    | (1, 47) = 2.5          | 0.12    | (2, 93) = 20.2       | <0.001  | (2, 93) = 1.2        | 0.30    | 0.88                            | <0.001                    |
|                                                | Standard Limb | 1.99 ± 2.37  | 0.65 ± 1.69     | -0.03 ± 1.84    |                        |         |                      |         |                      |         | 0.02                            | <0.001                    |
| Corrected for insulin concentration Ra         | Long Limb     | 191.7 ± 83.3 | 115.6 ± 55.8    | 82.5 ± 59.4     | (1, 46) = 0.64         | 0.43    | (2, 92) = 59.5       | <0.001  | (2, 92) = 0.4        | 0.96    | <0.001                          | <0.001                    |
|                                                | Standard Limb | 204.6 ± 66.0 | 121.1 ± 34.9    | 91.5 ± 49.6     |                        |         |                      |         |                      |         | <0.001                          | <0.001                    |

|                                                                               |               |                  |              |                  |                   |      |                |        |                   |      |        |        |
|-------------------------------------------------------------------------------|---------------|------------------|--------------|------------------|-------------------|------|----------------|--------|-------------------|------|--------|--------|
| in low-dose<br>(umol/min/kg)                                                  |               |                  |              |                  |                   |      |                |        |                   |      |        |        |
| Corrected for<br>insulin<br>concentration Ra<br>in high-dose<br>(umol/min/kg) | Long Limb     | 128.6 ±<br>237.2 | 85.3 ± 209.5 | -89.4 ±<br>135.2 | (1, 47) = 1.8     | 0.18 | (2, 93) = 19   | <0.001 | (2, 93) =<br>1.5  | 0.23 | 1.00   | <0.001 |
|                                                                               | Standard Limb | 231.5 ±<br>277.6 | 67.8 ± 190.7 | -3.7 ± 175.3     |                   |      |                |        |                   |      | 0.007  | <0.001 |
| Rd in low -dose<br>insulin infusion<br>(umol/min/kg)                          | Long Limb     | 10.58 ± 3.56     | 13.56 ± 4.21 | 16.48 ± 4.06     | (1, 47) = 2.9     | 0.10 | (2, 93) = 68.6 | <0.001 | (2, 93) =<br>0.6  | 0.57 | <0.001 | <0.001 |
|                                                                               | Standard Limb | 9.79 ± 1.65      | 11.76 ± 2.90 | 15.24 ± 2.82     |                   |      |                |        |                   |      | 0.02   | <0.001 |
| Rd in high -dose<br>insulin infusion<br>(umol/min/kg)                         | Long Limb     | 19.13 ± 9.37     | 29.21 ± 9.90 | 38.13 ± 9.18     | (1, 47) = 0.3     | 0.61 | (2, 93) = 84.8 | <0.001 | (2, 93) =<br>0.2  | 0.83 | <0.001 | <0.001 |
|                                                                               | Standard Limb | 18.49 ± 7.56     | 28.96 ± 9.08 | 36.12 ± 8.51     |                   |      |                |        |                   |      | <0.001 | <0.001 |
| Corrected for<br>insulin<br>concentration Rd<br>in low-dose<br>(umol/min/kg)  | Long Limb     | 0.29 ± 0.14      | 0.44 ± 0.22  | 0.52 ± 0.18      | (1, 47) = 1.8     | 0.19 | (2, 93) = 81.3 | <0.001 | (2, 93) =<br>3.0  | 0.05 | <0.001 | <0.001 |
|                                                                               | Standard Limb | 0.26 ± 0.10      | 0.34 ± 0.10  | 0.50 ± 0.14      |                   |      |                |        |                   |      | 0.01   | <0.001 |
| Corrected for<br>insulin<br>concentration Rd<br>in high-dose<br>(umol/min/kg) | Long Limb     | 0.17 ± 0.08      | 0.30 ± 0.13  | 0.42 ± 0.17      | (1, 47) =<br>0.07 | 0.79 | (2, 93) = 90.7 | <0.001 | (2, 93) =<br>0.04 | 0.97 | <0.001 | <0.001 |
|                                                                               | Standard Limb | 0.16 ± 0.08      | 0.30 ± 0.12  | 0.41 ± 0.11      |                   |      |                |        |                   |      | <0.001 | <0.001 |

**Table S7. Within groups comparisons of glycated haemoglobin and weight loss**

| Variable                   | Group         | Day of operation | 3 months post-op | 6 months post-op | 12 months post-op | Mixed-effects analyses |         |                      |         |                           |         | Post hoc comparisons<br>p value |                        |                         |
|----------------------------|---------------|------------------|------------------|------------------|-------------------|------------------------|---------|----------------------|---------|---------------------------|---------|---------------------------------|------------------------|-------------------------|
|                            |               |                  |                  |                  |                   | Group effect           |         | Visit effect         |         | Group * Visit interaction |         | Op vs 3 months post-op          | Op vs 6 months post-op | Op vs 12 months post-op |
|                            |               |                  |                  |                  |                   | (DFn, DFd) = F value   | P value | (DFn, DFd) = F value | P value | (DFn, DFd) = F value      | P value |                                 |                        |                         |
| HbA1c (mmol/mol)           | Long Limb     | 76 ± 16          | 48 ± 10          | 41 ± 6           | 41 ± 5            | (1, 49) = 0.4          | 0.54    | (3, 145) = 159.3     | <0.001  | (3, 145) = 1.5            | 0.22    | <0.001                          | <0.001                 | <0.001                  |
|                            | Standard Limb | 73 ± 17          | 50 ± 10          | 44 ± 8           | 43 ± 10           |                        |         |                      |         |                           |         | <0.001                          | <0.001                 | <0.001                  |
| Total Body Weight Loss (%) | Long Limb     | 0                | 19 ± 4           | 24 ± 4           | 29 ± 8            | (1, 53) = 0.9          | 0.35    | (3, 152) = 479.6     | <0.001  | (3, 152) = 0.7            | 0.56    | <0.001                          | <0.001                 | <0.001                  |
|                            | Standard Limb | 0                | 19 ± 4           | 26 ± 6           | 30 ± 8            |                        |         |                      |         |                           |         | <0.001                          | <0.001                 | <0.001                  |

Continuous data presented as mean ± standard deviation. Statistical test used: mixed-effects analysis with Bonferroni adjustment for multiple comparisons in post-hoc analysis. p-values refer to comparing outcomes within Long Limb or Standard Limb at 2 weeks post-op visit and 20% weight loss visit. DFn – numerator degrees of freedom; DFd – denominator degrees of freedom. Ra: rate of glucose appearance. Rd: rate of glucose disappearance. Low: measured in the phase of low-dose insulin infusion. High: measured in the phase of high-dose insulin infusion. HbA1c – glycated haemoglobin.

**Table S8. Key clinical parameters at baseline and at 1 year after intervention – per protocol analysis.**

| Characteristic                            | Long Limb Baseline n=25                                 | Standard Limb Baseline n=25                            | Long Limb<br>1 year post-op n=25 | Standard Limb<br>1 year post-op n=25 | p value |
|-------------------------------------------|---------------------------------------------------------|--------------------------------------------------------|----------------------------------|--------------------------------------|---------|
| Gender % (n)                              | Female 72% (18)                                         | Female 60% (15)                                        |                                  |                                      |         |
| Ethnicity % (n)                           | 68% White (17), 24% Asian (6),<br>8% Afro-Caribbean (2) | 84% White (21), 8% Asian (2),<br>8% Afro-Caribbean (2) |                                  |                                      |         |
| Age (years)                               | 47 ± 8                                                  | 50 ± 10                                                |                                  |                                      |         |
| Weight (kg)                               | 120 ± 28                                                | 116 ± 18                                               | 87 ± 25                          | 81 ± 13                              | 0.87    |
| BMI (kg/m <sup>2</sup> )                  | 43 ± 8                                                  | 41 ± 4                                                 | 31 ± 7                           | 29 ± 4                               | 0.96    |
| Total body weight loss (%)                |                                                         |                                                        | 29 ± 8                           | 30 ± 9                               | 0.52*   |
| Waist circumference (cm)                  | 128 ± 14                                                | 129 ± 12                                               | 100 ± 16                         | 97 ± 12                              | 0.46    |
| Neck circumference (cm)                   | 44 ± 6                                                  | 44 ± 4                                                 | 37 ± 5                           | 37 ± 4                               | 0.89    |
| Total body fat percentage (%)             | 44 ± 6                                                  | 43 ± 7                                                 | 30 ± 9                           | 27 ± 8                               | 0.55    |
| Total body fat free mass (kg)             | 66 ± 15                                                 | 63 ± 13                                                | 56 ± 12                          | 56 ± 10                              | 0.54    |
| Duration of T2DM (years)                  | 6 [4-11]                                                | 8 [5-10]                                               |                                  |                                      |         |
| Number of glucose-lowering<br>medications | 3 [2-4]                                                 | 3 [2-4]                                                | 0 [0-0]                          | 0 [0-0]                              | n.s.    |
| HbA1c (mmol/mol)                          | 76 ± 16                                                 | 72 ± 14                                                | 40 ± 5                           | 44 ± 10                              | 0.17    |

|                                     |  |          |          |       |
|-------------------------------------|--|----------|----------|-------|
| <b>Rate of T2DM remission % (n)</b> |  | 76% (19) | 60% (15) | 0.36^ |
|-------------------------------------|--|----------|----------|-------|

Categorical data presented as percentage (n). Continuous data presented as mean  $\pm$  SD when normally distributed or median [interquartile range] when non-normally distributed. Statistical tests used: logistic regression, \*unpaired t-test, ^Fisher's exact test. p-values refer to comparing Long Limb versus Standard Limb outcomes at 1 year post-operatively. RYGB: Roux-en-Y gastric bypass, BMI: Body Mass Index, T2DM – type 2 diabetes mellitus. HbA1c – glycated haemoglobin, n.s.: not significant.

## CONSORT Flow Diagram

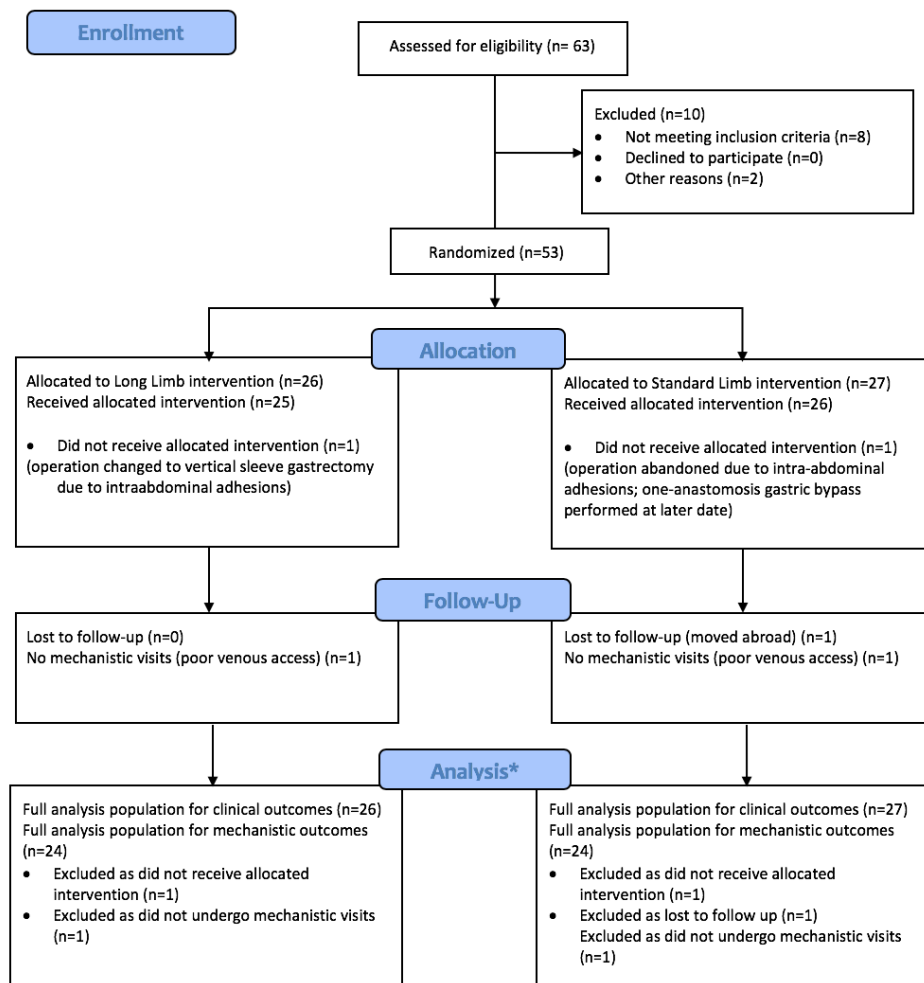

Supplement: Supplementary file 1 [file 1 › Reviewed Clean Copy Diabetes Care Supplementary material 201103.pdf]
