# Supplementary material
Source: publisher figshare collection journal article supplement (https://diabetesjournals.figshare.com/articles/dataset/_/12814262)
Supplement: Supplementary file 1 [file 1]

Archive with 2 entries (2 files):
- Reviewed Clean Copy Diabetes Care Supplementary material 201103.pdf
- Statistical_Analysis_Plan_200323.pdf
